# Supplementary material
Source: Springer Nature journal article supplement (https://www.springermedizin.de/resource/supplementary/13223_2013_491_MOESM5_ESM.pdf/9596628)
Supplement: MOESM5 [file 9596628]

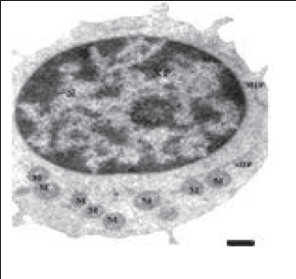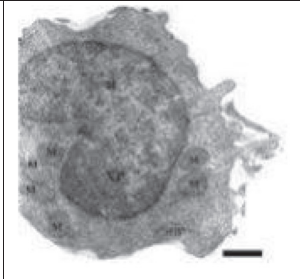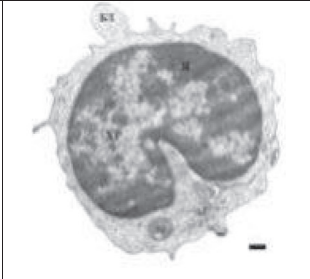

*Lymphocyte of clinically healthy donors in vivo*

**a**

*Lymphocyte of patients with asthma of mild severity in vivo*

**b**

*Lymphocyte of patients with asthma of severe severity in vivo*

**c**
